# Supplementary material
Source: HighWire-hosted journal article supplement (https://erj.ersjournals.com/content/52/2/1702593)

## **Stability or improvement in forced vital capacity with nintedanib in patients with IPF**

Kevin R Flaherty,<sup>1</sup> Martin Kolb,<sup>2</sup> Carlo Vancheri,<sup>3</sup> Wenbo Tang,<sup>4</sup> Craig S Conoscenti,<sup>4</sup> Luca Richeldi<sup>5</sup>

<sup>1</sup>University of Michigan Health System, Ann Arbor, Michigan, USA; <sup>2</sup>McMaster University, Hamilton, Ontario, Canada; <sup>3</sup>Department of Clinical and Experimental Medicine, University of Catania, Catania, Italy; <sup>4</sup>Boehringer Ingelheim Pharmaceuticals, Inc., Ridgefield, Connecticut, USA; <sup>5</sup>Università Cattolica del Sacro Cuore, Fondazione Policlinico A. Gemelli, Rome, Italy.

**Supplementary material**

Figure S1. Proportions of patients with degrees of decline and improvement in FVC in the INPULSIS<sup>®</sup> trials based on annual rate of change (mL/year)

Nintedanib

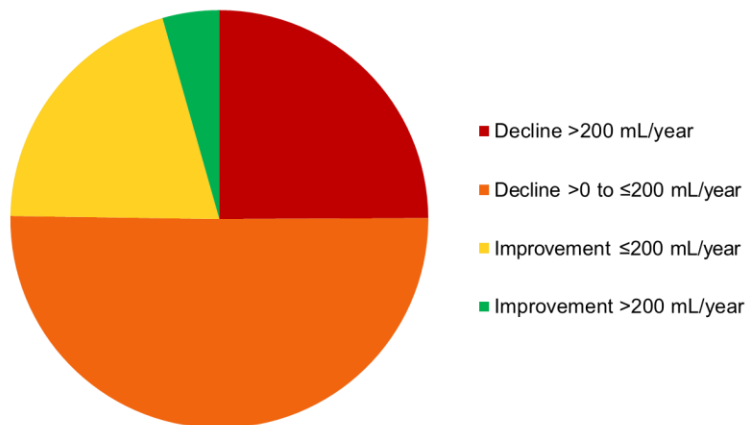

Placebo

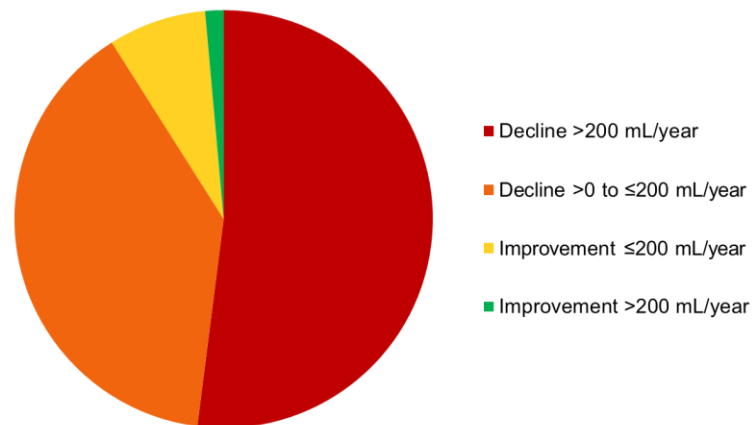

Figure S2. Baseline FVC (mL) in subgroups by annual rate of change in FVC in the INPULSIS® trials

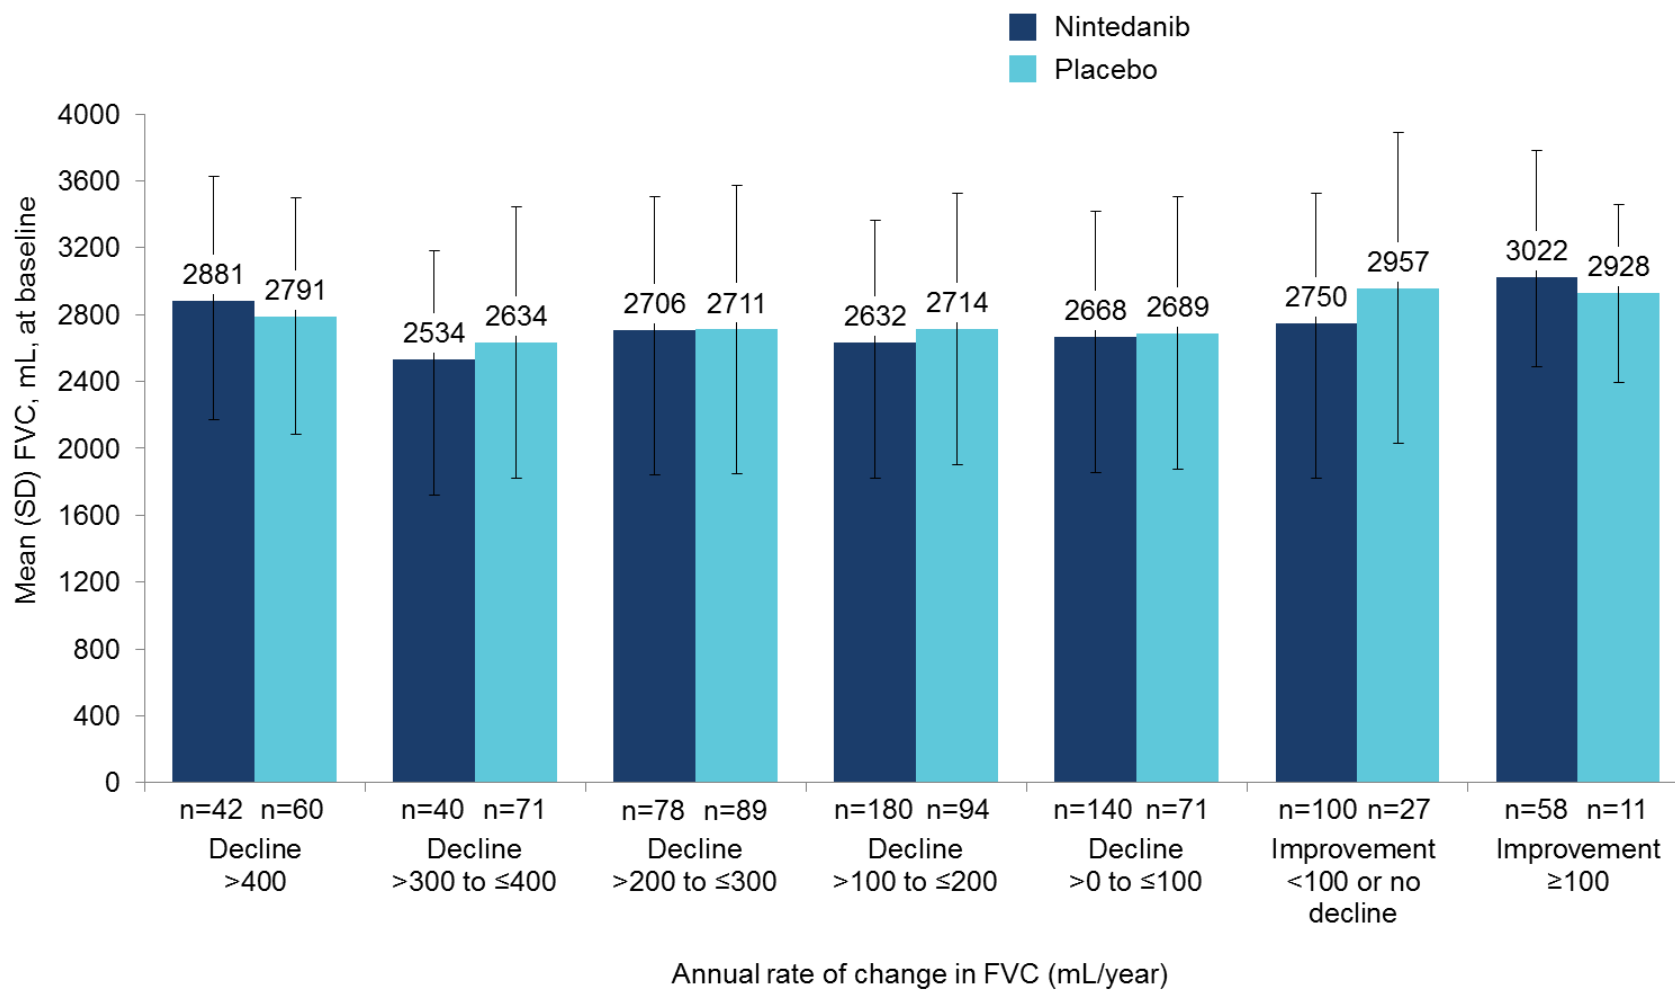

Figure S3. Baseline FVC (% predicted) in subgroups by annual rate of change in FVC in the INPULSIS® trials

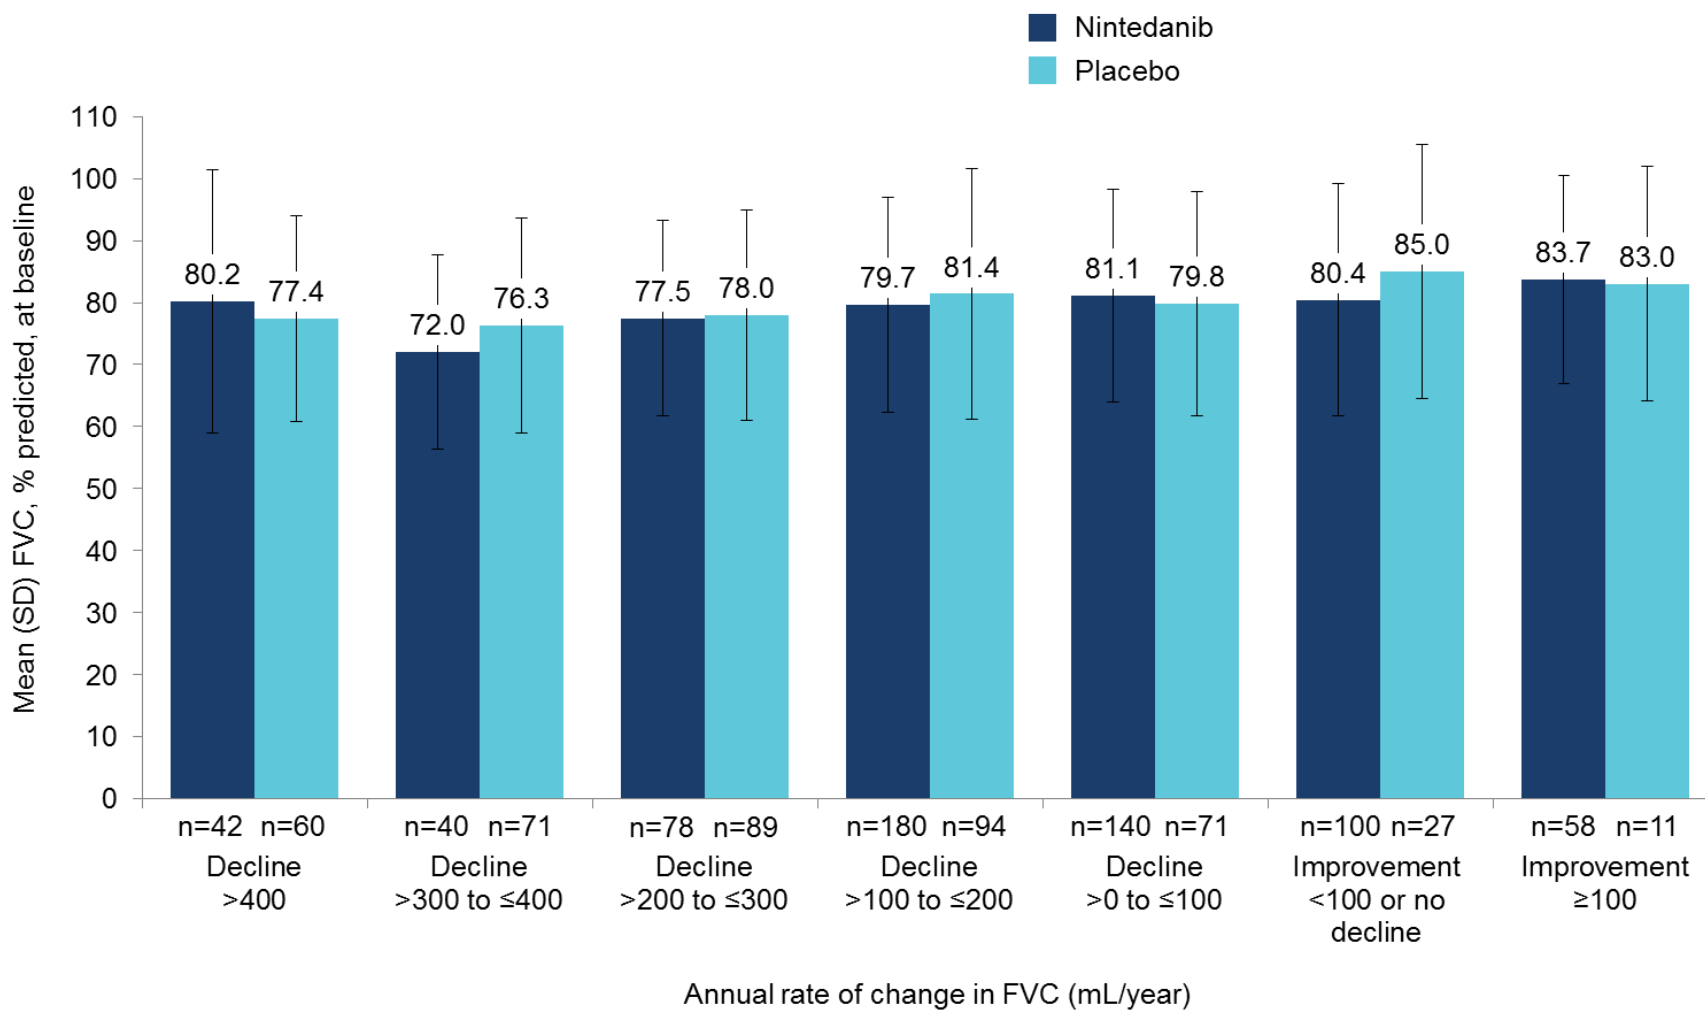

Figure S4. Baseline DLco % predicted in subgroups by annual rate of change in FVC in the INPULSIS® trials

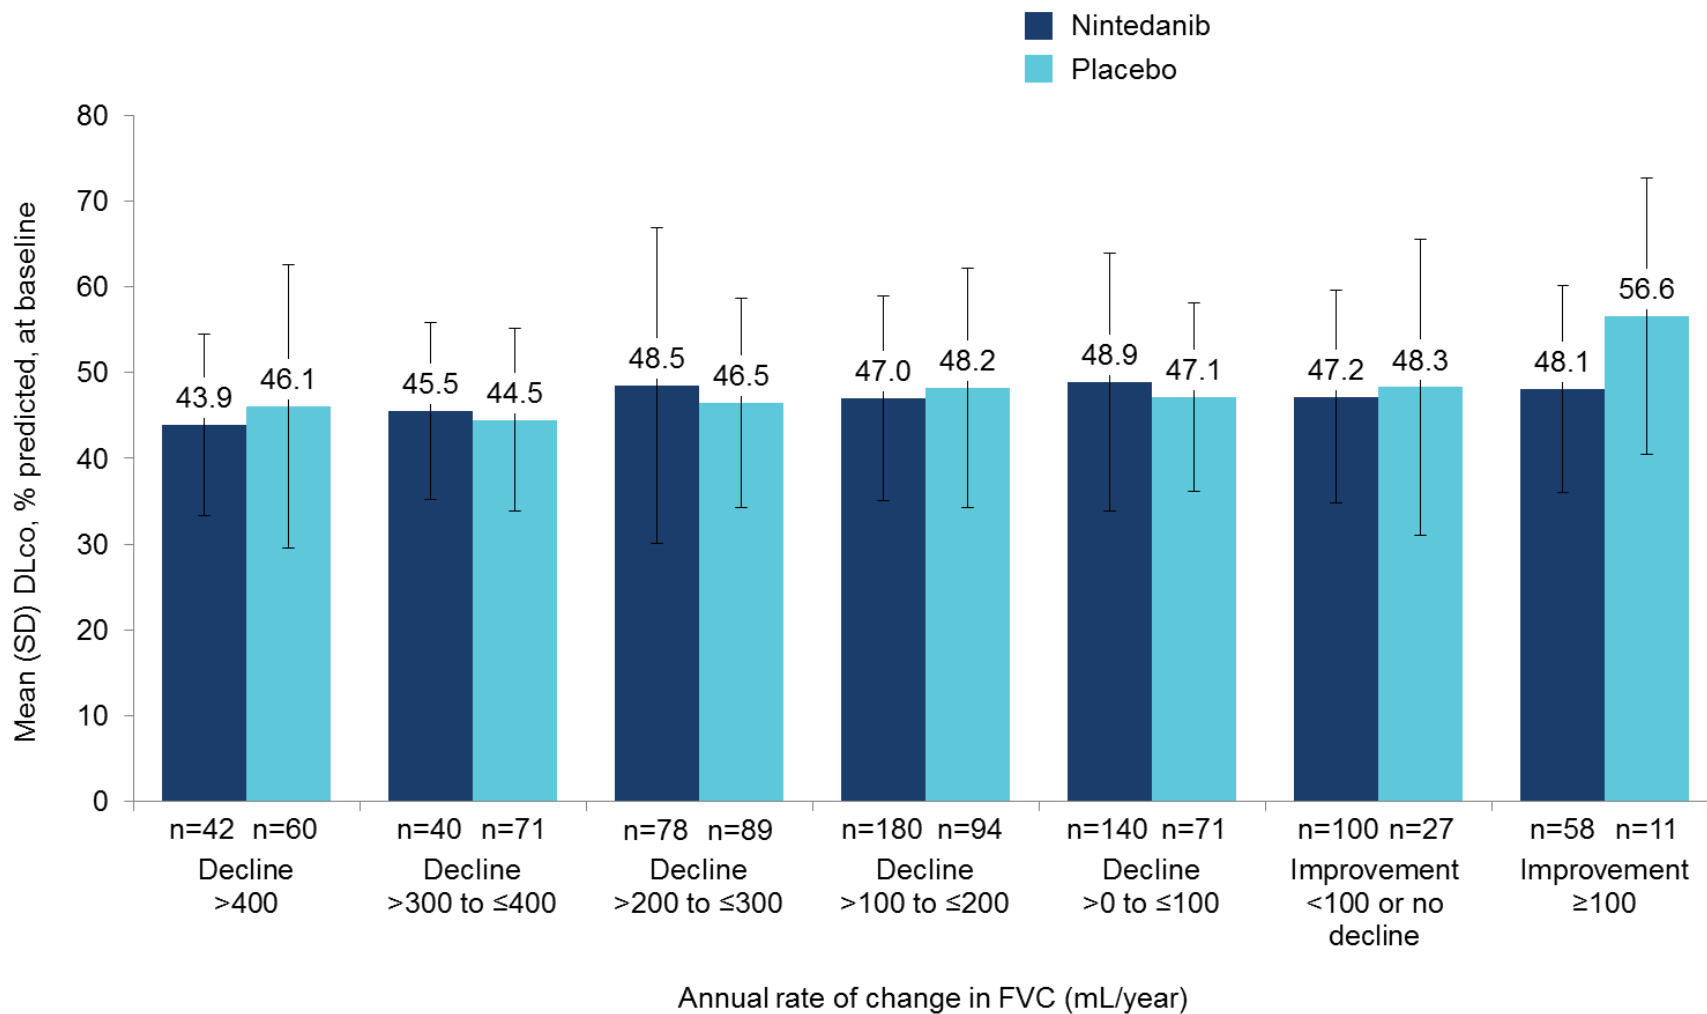

Figure S5. Proportion of patients with honeycombing on HRCT at baseline in subgroups by annual rate of change in FVC in the INPULSIS® trials

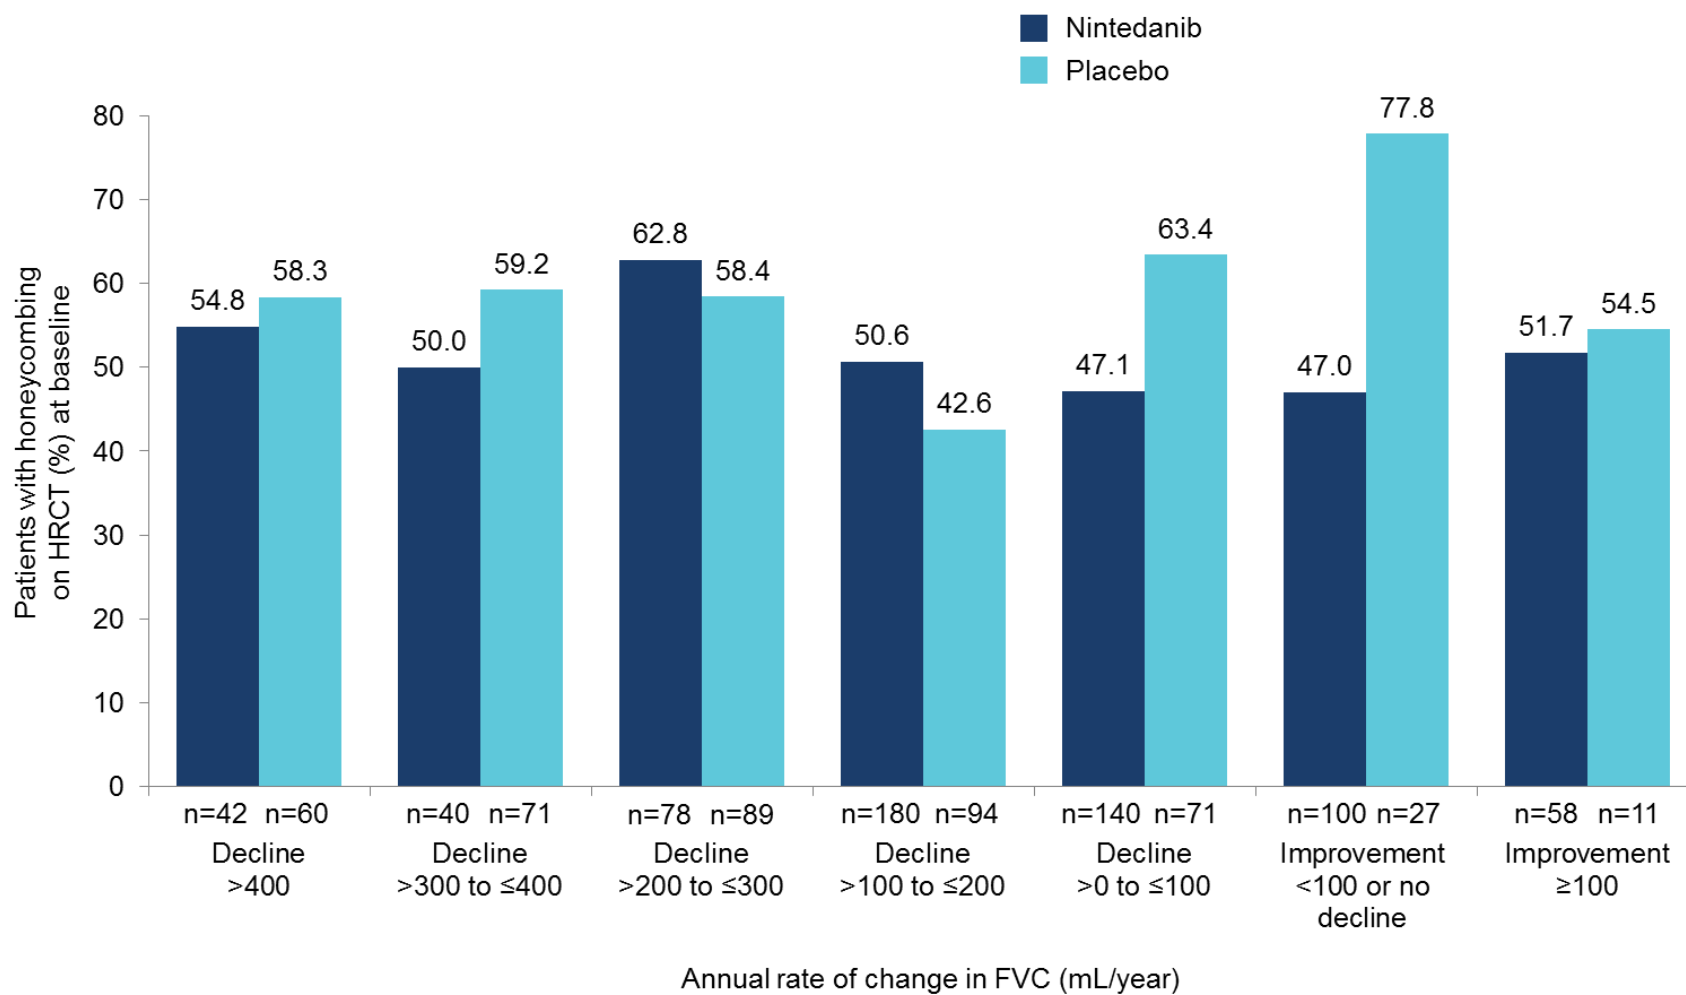

Figure S6. Change from baseline in FVC (mL) at week 52 in the INPULSIS® trials

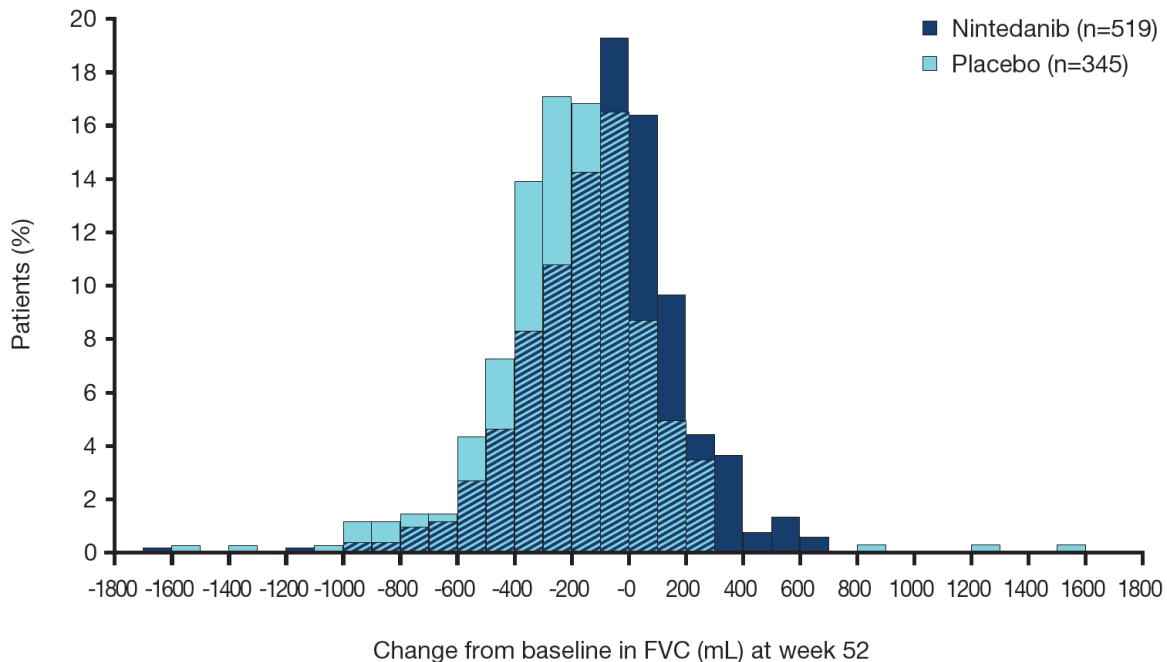

Figure S7. Change from baseline in FVC % predicted at week 52 in the INPULSIS® trials

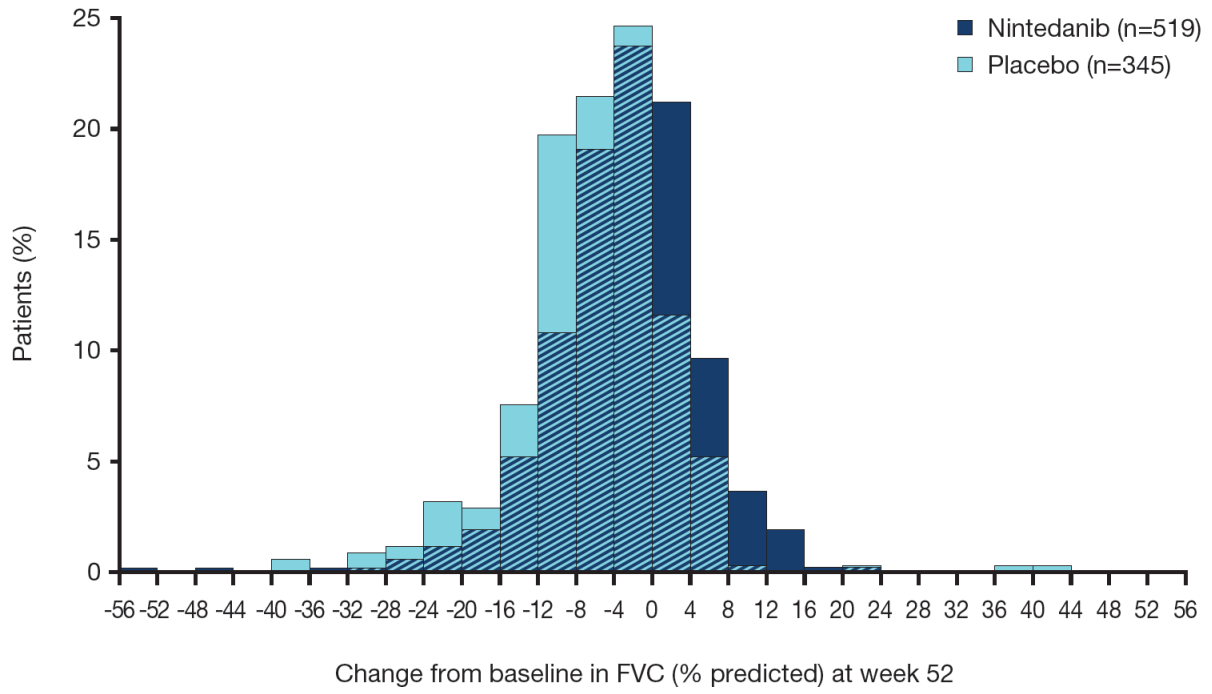

Supplement: inline-supplementary-material-1 [file inline-supplementary-material-1.pdf]
